# Supplementary material
Source: PubMed Central journal article supplement (PMC2409388)
Supplement: 0801567105_Supplemental_PDF.pdf [file 0801567105_Supplemental_PDF.pdf]

# Supporting Information

McCullough *et al.* 10.1073/pnas.0801567105

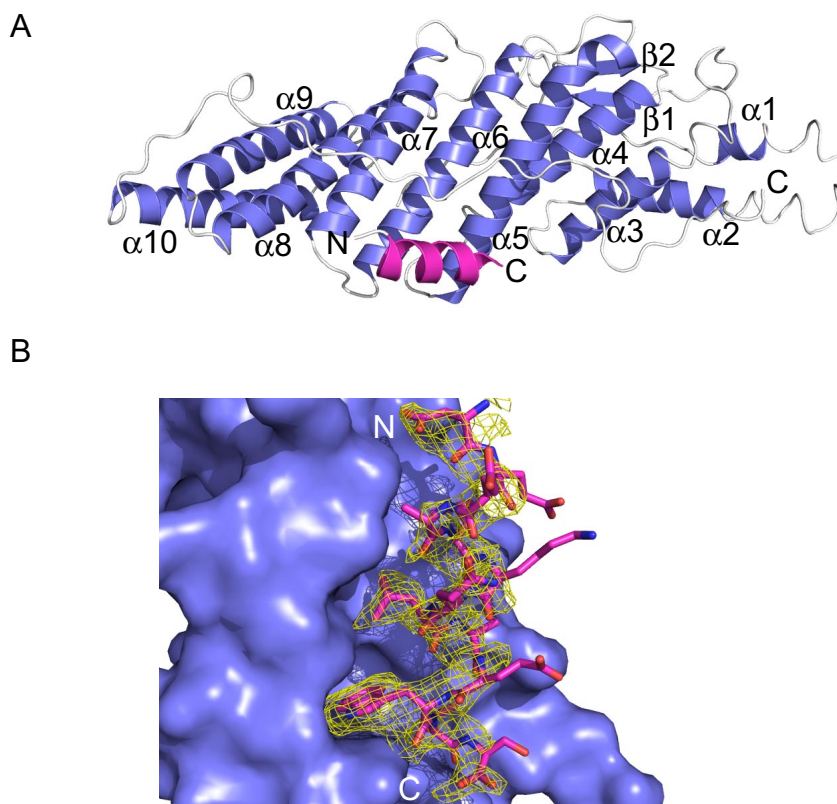

**Fig. S1.** ALIX<sub>Bro1</sub> in complex with the C-terminal CHMP4A helix. (A) Ribbon diagram showing the complex between ALIX<sub>Bro1</sub> and the C-terminal helix from CHMP4A (purple). This figure is oriented so that the CHMP4A helix in Fig. 1 *Lower* is rotated  $\approx 90^\circ$  toward the viewer. (B) CHMP4A is represented in sticks against a solid ALIX surface, with the Fo-Fc peptide omit map contoured at  $2 \times \text{rmsd}$  and displayed over the peptide. To generate the peptide omit map, the peptide was deleted from the model, random shifts ( $0.3 \text{ \AA}$  in  $x, y, z$ ) were applied throughout and the model re-refined without the peptide in REFMAC. The orientation is the same as in Fig. 3.

A

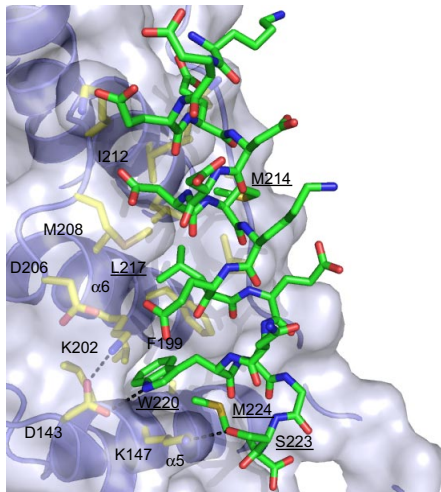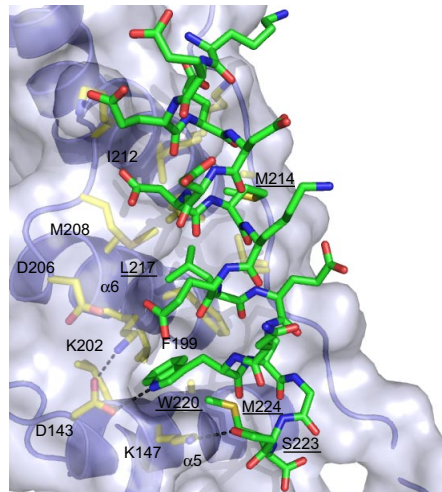

B

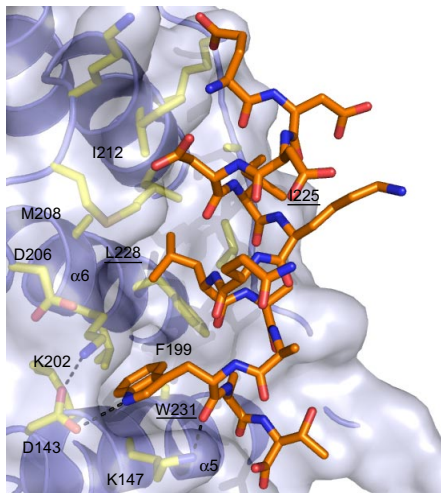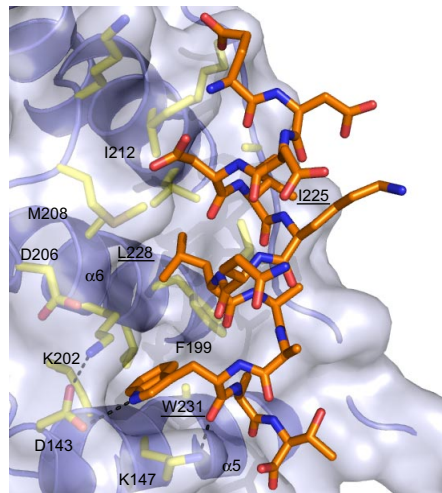

**Fig. S2.** Stereoviews of ALIX<sub>Bro1</sub>-CHMP4B and ALIX<sub>Bro1</sub>-CHMP4C interfaces. (A) ALIX<sub>Bro1</sub>-CHMP4B. (B) ALIX<sub>Bro1</sub>-CHMP4C. Views and designations are the same as in Fig. 3A, except that CHMP4B is shown in green and CHMP4C is shown in orange.





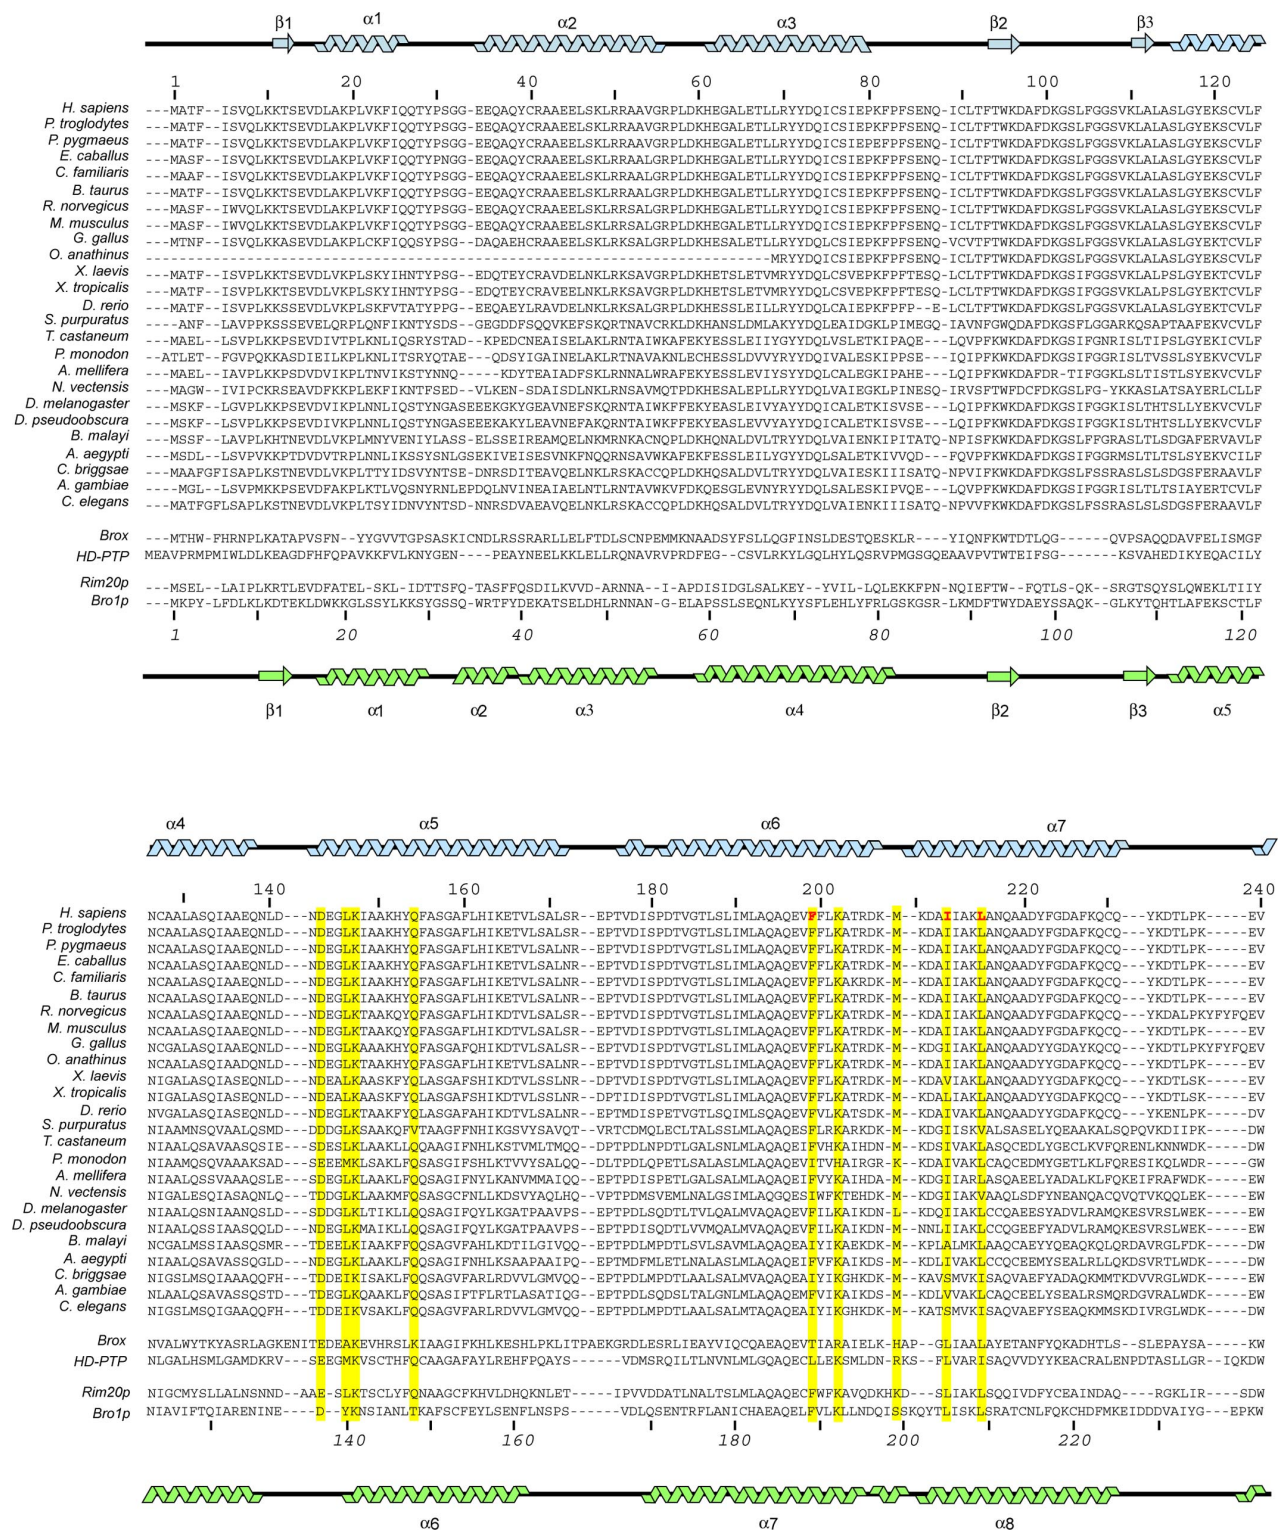

Fig. S4. (Continued on next page.)

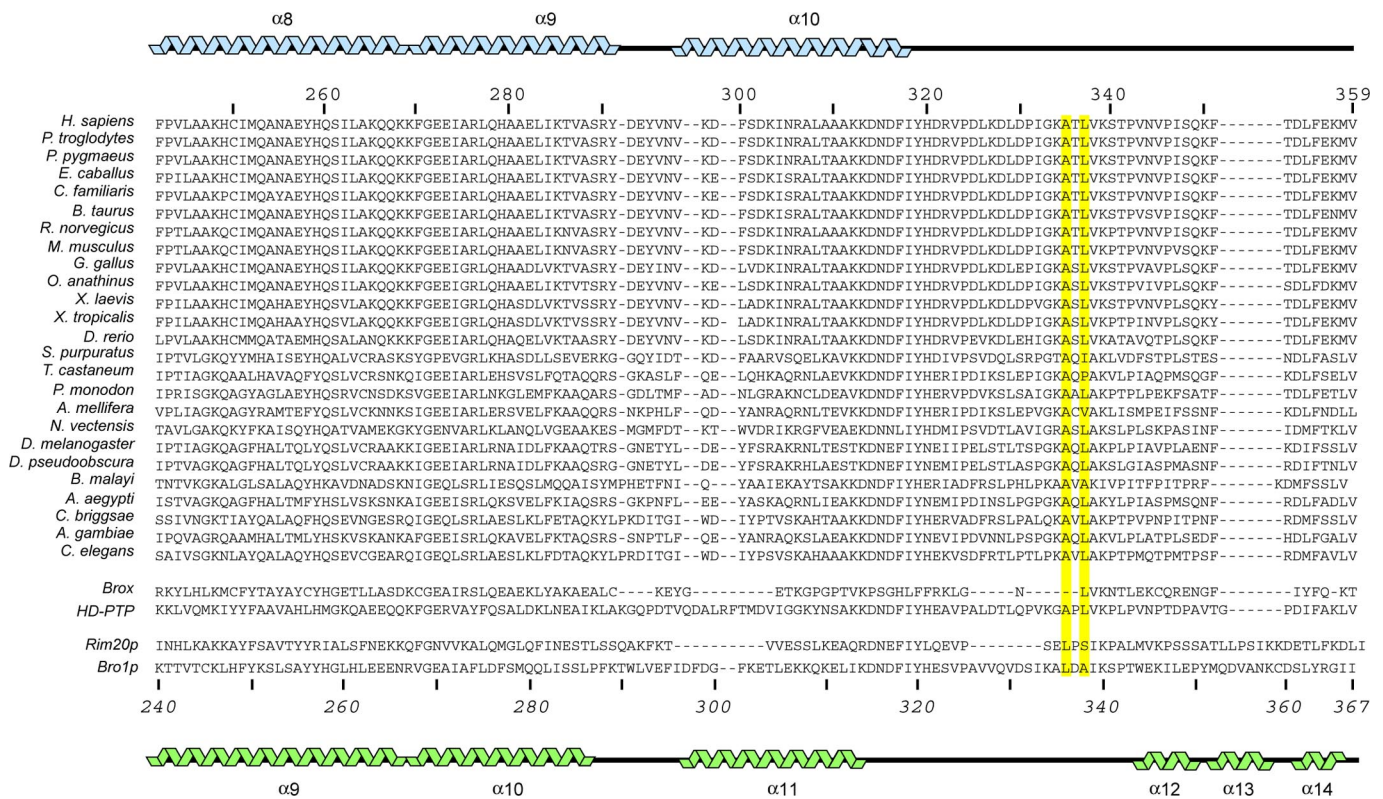

**Fig. S4 (Continued).** Sequence alignments and secondary structures of Bro1 domains. Secondary structures of the Bro1 domain of ALIX (*Upper*) and Bro1p (*Lower*) (PDB entry 1zb1) are shown together with aligned primary sequences of ALIX<sub>Bro1</sub> domains from 25 representative metazoan species (top sequence block), Bro1 domains from the human Brox and HD-PTP proteins (middle sequence block), and Bro1 domains from the yeast Rim20p and Bro1p proteins (bottom sequence block). ALIX<sub>Bro1</sub> and Bro1p were aligned by least squares overlap of the two structures, and other sequence alignments were performed by using the ClustalW server [http://npsa-pbil.ibcp.fr/NPSA/npsa\\_clustalw.html](http://npsa-pbil.ibcp.fr/NPSA/npsa_clustalw.html) [Combet C, Blanchet C, Geourjon C, Deléage (2000) NPS@: Network protein sequence analysis. *Trends Biochem Sci* 25:147–150]. Residues highlighted in yellow make contacts with CHMP4A in the ALIXBro1-CHMP4A<sub>205–222</sub> structure and residues italicized in bold and red block ALIX binding and HIV-1 budding when mutated to Asp.

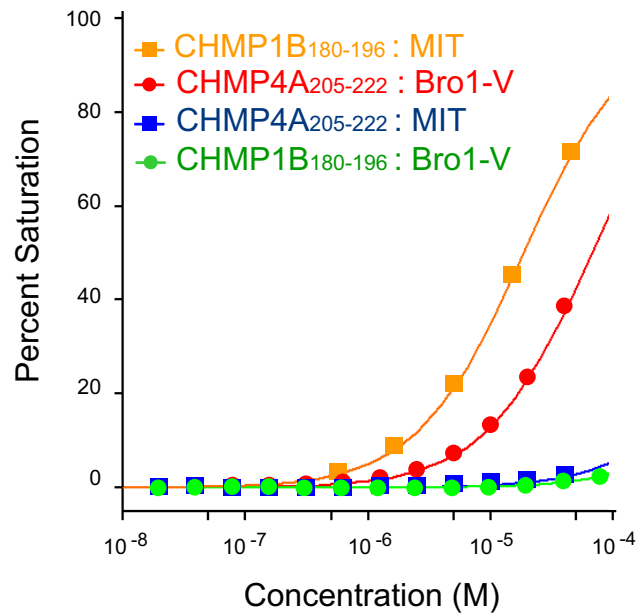

**Fig. S5.** Selectivity of the CHMP4A and CHMP1B recognition helices for ALIX<sub>Bro1-V</sub> and Vps4A MIT. Biosensor isotherms showing ALIX<sub>Bro1-V</sub> and Vps4A MIT domain binding to immobilized GST-CHMP4A<sub>205-222</sub> and GST-CHMP1B<sub>180-196</sub>. Estimated dissociation constants for ALIX<sub>Bro1-V</sub> interactions were: GST-CHMP4A<sub>205-222</sub>,  $44 \pm 6 \mu\text{M}$ , GST-CHMP1B<sub>180-196</sub>,  $> 1 \text{ mM}$ . Estimated dissociation constants for VPS4A MIT domain interactions were: GST-CHMP4A<sub>205-222</sub>,  $> 1 \text{ mM}$ , GST-CHMP1B<sub>180-196</sub>,  $18.5 \pm 0.6 \mu\text{M}$  (dissociation constant and error were estimated from a statistical fit of a single binding isotherm derived from duplicate measurements at six different Vps4A MIT domain concentrations over a range of 0–140  $\mu\text{M}$ ). Binding to a control GST surface was negligible in all cases (data not shown).

**Table S1. Data collection and refinement statistics for ALIX<sub>Bro1</sub>-CHMP4 complexes**

| Statistic                          | CHMP4A                | CHMP4B                    | CHMP4C                |
|------------------------------------|-----------------------|---------------------------|-----------------------|
| Data collection                    |                       |                           |                       |
| Space group                        | C2                    | C2                        | C2                    |
| Cell dimensions                    |                       |                           |                       |
| <i>a</i> , <i>b</i> , <i>c</i> , Å | 120.7, 62.7, 76.1     | 120.5, 62.6, 76.1         | 120.9, 62.4, 76.4     |
| <i>b</i> , deg.                    | 122.1                 | 121.5                     | 121.6                 |
| Resolution, Å                      | 50.0–2.15 (2.23–2.15) | 50.0–2.1 (2.18–2.10)      | 50.0–2.02 (2.09–2.02) |
| <i>R</i> <sub>sym</sub>            | 0.063 (0.334)         | 0.067 (0.413)             | 0.066 (0.596)         |
| <i>I</i> / $\sigma$ ( <i>I</i> )   | 19 (1.8)              | 14 (1.7)                  | 9 (1.5)               |
| Completeness, %                    | 94.9 (75.1)           | 92.3 (67.6)               | 95.5 (81.0)           |
| Redundancy                         | 9.5 (3.8)             | 7.2 (4.6)                 | 6.6 (4.4)             |
| Refinement                         |                       |                           |                       |
| Resolution, Å                      | 50.0–2.15 (2.21–2.15) | 50.0–2.10 (2.154–2.10)    | 50.0–2.02 (2.07–2.02) |
| Reflections, no.                   | 25,024                | 26,458                    | 30,381                |
| <i>R</i> <sub>work</sub>           | 0.214 (0.305)         | 0.228 (0.326)             | 0.243 (0.333)         |
| <i>R</i> <sub>free</sub>           | 0.284 (0.344)         | 0.290 (0.386)             | 0.291 (0.411)         |
| Number of atoms                    |                       |                           |                       |
| Protein                            | 2911                  | 2953                      | 2905                  |
| Ligand/ion                         | 6                     | 6                         | 6                     |
| Water                              | 127                   | 90                        | 56                    |
| $\langle B \rangle$ -factors       |                       |                           |                       |
| Protein                            | 33.2                  | 35.3                      | 34.0                  |
| Ligand/ion                         | 82.5                  | 78.9                      | 85.8                  |
| Water                              | 49.9                  | 55.0                      | 51.3                  |
| rmsd                               |                       |                           |                       |
| Bond lengths, Å                    | 0.019                 | 0.017                     | 0.016                 |
| Bond angles, deg.                  | 1.710                 | 1.653                     | 1.542                 |
| Ramachandran plot, %               |                       |                           |                       |
| Most favored                       | 89.7                  | 88.0                      | 90.6                  |
| Additionally allowed               | 9.7                   | 10.8                      | 8.6                   |
| Generously allowed                 | 0.3 (Q27)             | 1.2 (K207, Q27, S31, C40) | 0.3 (K207)            |
| Disallowed                         | 0.3 (Q88)             | 0.0                       | 0.6 (Y29, E34)        |

Diffraction data from one crystal were used to determine each structure. This includes the CHMP4A complex, for which data were collected in two separate sweeps from different beamlines. Values in parentheses refer to the high-resolution shell.



**Table S2. Thirty-four different CHMP4 protein sequences from 19 different metazoan species grouped together with the human CHMP4 isoform with which they show the greatest pair-wise identity throughout the entire protein**

| CHMP4 protein | Organism                        | NCBI protein accession no. | Overall identity to most homologous human CHMP4, % | C-terminal sequence           |
|---------------|---------------------------------|----------------------------|----------------------------------------------------|-------------------------------|
| 4A            | <i>Homo sapiens</i>             | Q9BY43                     | 100                                                | PKVDEDEEAL <b>KQLAE</b> WVS   |
| 4A            | <i>Pan troglodytes</i>          | XP_001169270               | 99(A)                                              | PKVDEDEEAL <b>KQLAE</b> WVS   |
| 4A            | <i>Canis familiaris</i>         | XP_537387                  | 91(A)                                              | PEADEDEAAL <b>KQLAE</b> WVS   |
| 4A            | <i>Bos taurus</i>               | AAI33472                   | 91(A)                                              | PKADEDEAAL <b>KQLAE</b> WVS   |
| 4A            | <i>Monodelphis domestica</i>    | XP_001380207               | 81(A)                                              | ASKTDEEKE <b>EMKQLVD</b> WVS  |
| 4B            | <i>Homo sapiens</i>             | NP_789782                  | 100                                                | KKKEEEDDD <b>MKELEN</b> WAGSM |
| 4B            | <i>Mus musculus</i>             | NP_083638                  | 99(B)                                              | KKKEEEDDD <b>MKELEN</b> WAGSM |
| 4B            | <i>Macaca mulatta</i>           | XP_001105255               | 99(B)                                              | KKKEEEDDD <b>MKELEN</b> WAGSM |
| 4B            | <i>familiaris</i>               | XP_542966                  | 97(B)                                              | KKKEEEDDD <b>MKELEN</b> WAGSM |
| 4B            | <i>Bos taurus</i>               | AAI23448                   | 97(B)                                              | KKKEEEDDD <b>MKELET</b> WAGTI |
| 4B            | <i>Rattus norvegicus</i>        | XP_001073409               | 97(B)                                              | KKKEEEDDD <b>MKELEN</b> WAGSM |
| 4B            | <i>Monodelphis domestica</i>    | XP_001381361               | 96(B)                                              | KKKEEEDDD <b>MKELEN</b> WAGSM |
| 4B            | <i>Ornithorhynchus anatinus</i> | XP_001518785               | 94(B)                                              | KKKEEEDDD <b>MKELEN</b> WAGSM |
| 4B            | <i>Equus caballus</i>           | XP_001499057               | 94(B)                                              | KKKEEEDDD <b>MKELEN</b> WAGTI |
| 4B            | <i>Gallus gallus</i>            | NP_001006286               | 91(B)                                              | KKKEEEDDD <b>MKELEA</b> WAGNM |
| 4B            | <i>Xenopus laevis</i>           | Q5XGW6                     | 87(B)                                              | KKQEEDDDD <b>MRELEN</b> WATA  |
| 4B            | <i>Xenopus tropicalis</i>       | Q6GL11                     | 87(B)                                              | KKQEEDDDD <b>MRELEN</b> WATA  |
| 4B            | <i>Danio rerio</i>              | Q7ZVC4                     | 86(B)                                              | KKKEEEDDD <b>MKLEA</b> WAAN   |
| 4B            | <i>Nematostella vectensis</i>   | XP_001639344               | 67(B)                                              | AKKKTEDDDD <b>LAELEA</b> WAS  |
| 4B            | <i>Ornithodoros moubata</i>     | AA559855                   | 66(B)                                              | SKAVMEDP <b>DMIELEA</b> QWAS  |
| 4B            | <i>Anopheles gambiae</i>        | XP_315330                  | 64(B)                                              | AVAEEDDP <b>DMKELM</b> SWAN   |
| 4B            | <i>Caenorhabditis elegans</i>   | AAA68771                   | 61(B)                                              | PRAKEADK <b>DLEDES</b> SWAN   |
| 4B            | <i>Drosophila melanogaster</i>  | NP_610462                  | 57(B)                                              | AVEDDDDP <b>DMKQLLS</b> WSN   |
| 4C            | <i>Homo sapiens</i>             | Q96CF2                     | 100                                                | QRAEEEDDD <b>IKQLA</b> AWAT   |
| 4C            | <i>Pan troglodytes</i>          | XP_528179                  | 99(C)                                              | RRAEEEDDD <b>IKQLA</b> AWAT   |
| 4C            | <i>Macaca mulatta</i>           | XP_001093735               | 98(C)                                              | RRAEEEDDD <b>IKQLA</b> AWAT   |
| 4C            | <i>Canis familiaris</i>         | XP_535115                  | 88(C)                                              | SKRTEEVDD <b>IKQLA</b> AWAP   |
| 4C            | <i>Bos taurus</i>               | AAI13332                   | 88(C)                                              | RRTEGEDDD <b>IQHLEA</b> WAT   |
| 4C            | <i>Monodelphis domestica</i>    | XP_001367000               | 88(C)                                              | SRRKEEDDD <b>IKQLA</b> AWAS   |
| 4C            | <i>Equus caballus</i>           | XP_001489156               | 87(C)                                              | RRAEEEDDD <b>IKKLSA</b> WAT   |
| 4C            | <i>Mus musculus</i>             | Q9D7F7                     | 84(C)                                              | SRRAEEDDD <b>FKQLA</b> AWAT   |
| 4C            | <i>Rattus norvegicus</i>        | Q569C1                     | 84(C)                                              | SRRAEEDDD <b>FKQLA</b> AWAT   |
| 4C            | <i>Gallus gallus</i>            | XP_418312                  | 72(C)                                              | RRRVEEDDD <b>MKQLA</b> AWAS   |
| 4C            | <i>Xenopus laevis</i>           | Q6GNN8                     | 69(C)                                              | SKKVEDDDD <b>MQMLA</b> AWAT   |

Conserved hydrophobic, Leu, and Trp positions in the terminal recognition helix are in bold. For reference, pairwise identities between the three human CHMP4 isoforms are 62% (A vs. B), 52% (A vs. C), and 61% (B vs. C), whereas the nearest identity between a human CHMP4 protein and another human CHMP protein is 30% (CHMP4A vs. CHMP5). Note that our current nomenclature for CHMP4A (NCBI protein accession locus Q9BY43), CHMP4B (NP\_789782), and CHMP4C (Q96CF2) matches the current NCBI database annotations ([www.ncbi.nlm.nih.gov/sites/entrez](http://www.ncbi.nlm.nih.gov/sites/entrez)) but that the designations of CHMP4A and CHMP4B are reversed from those used in several previous publications.
